# Supplementary material for: A BODIPY-based fluorescent chemodosimeter for Cu(ii) driven by an oxidative dehydrogenation mechanism
Source: Royal Society of Chemistry journal article supplement (doi:10.1039/c0cc04069j), 2011-01-01
Supplement: c0cc04069j.pdf [file c0cc04069j.pdf]

# A BODIPY-based fluorescent chemodosimeter for Cu(II) driven by oxidative dehydrogenation mechanism

Dongping Wang, Yasuhiro Shiraishi\* and Takayuki Hirai

*Research Center for Solar Energy Chemistry, and Division of Chemical Engineering,  
Graduate School of Engineering Science, Osaka University, Toyonaka 560-8531, Japan*

*E-mail: shiraish@cheng.es.osaka-u.ac.jp*

## Electronic Supplementary Information (ESI)†

### Contents

|                                                                                                                    | page |
|--------------------------------------------------------------------------------------------------------------------|------|
| General.....                                                                                                       | 2    |
| Synthesis.....                                                                                                     | 2    |
| Fig. S1–S3 <sup>1</sup> H NMR, gCOSY and <sup>13</sup> C NMR charts of <b>2</b> .....                              | 4    |
| Fig. S4–S6 <sup>1</sup> H NMR, gCOSY and <sup>13</sup> C NMR charts of <b>3</b> .....                              | 7    |
| Fig. S7–S9 <sup>1</sup> H NMR, gCOSY and <sup>13</sup> C NMR charts of <b>4</b> .....                              | 10   |
| Fig. S10 Absorption spectra of <b>1</b> measured with respective metal cations.....                                | 13   |
| Fig. S11 Competition experiments of <b>1</b> .....                                                                 | 13   |
| Fig. S12 pH-dependent change in fluorescence intensity of <b>1</b> with and without Cu <sup>2+</sup> .....         | 14   |
| Fig. S13 Absorption and fluorescence spectra of <b>1</b> with different Cu <sup>2+</sup> salts.....                | 14   |
| Fig. S14 Time-dependent change in fluorescence intensity of <b>1</b> after Cu <sup>2+</sup> addition.....          | 15   |
| Fig. S15 Temperature-dependent change in absorption spectra of <b>1</b> with Cu <sup>2+</sup> .....                | 15   |
| Fig. S16 Absorption and fluorescence spectra of <b>1</b> measured with Cu <sup>2+</sup> and EDTA.....              | 16   |
| Fig. S17 Geometry optimized structure of <b>1</b> –Cu <sup>+</sup> 2:1 complex.....                                | 17   |
| Fig. S18 Job's plot of <b>1</b> with Cu <sup>2+</sup> .....                                                        | 19   |
| Fig. S19 <sup>1</sup> H NMR spectra of <b>1</b> , <b>2</b> , and <b>1</b> –Cu complex.....                         | 20   |
| Fig. S20 ESR spectra of Cu(ClO <sub>4</sub> ) <sub>2</sub> and <b>1</b> –Cu complex.....                           | 20   |
| Fig. S21 Effect of molecular oxygen on the fluorescence enhancement.....                                           | 21   |
| Fig. S22 Fluorescence and absorption spectra of <b>1</b> – <b>4</b> with Cu <sup>2+</sup> or Cu <sup>+</sup> ..... | 21   |
| Fig. S23 Effect of water amount on fluorescence and excitation spectra.....                                        | 22   |

## General

All reagents were supplied by Wako, Aldrich, and Tokyo Kasei, and used without further purification. Perchlorate ( $\text{Li}^+$ ,  $\text{Na}^+$ ,  $\text{Mg}^{2+}$ ,  $\text{Mn}^{2+}$ ,  $\text{Cr}^{3+}$ ,  $\text{Fe}^{2+}$ ,  $\text{Fe}^{3+}$ ,  $\text{Co}^{2+}$ ,  $\text{Ni}^{2+}$ ,  $\text{Cu}^{2+}$ ,  $\text{Zn}^{2+}$ ,  $\text{Cd}^{2+}$ ,  $\text{Hg}^{2+}$ ,  $\text{Pb}^{2+}$ ), tetrafluoroborate ( $\text{Ag}^+$ ), and iodide salts ( $\text{Cu}^+$ ) were used as the metal cation source. Water was purified by the Milli-Q system. Fluorescence spectra were measured on a Hitachi F-4500 fluorescence spectrophotometer (excitation and emission slit width, 2.5 nm). Absorption spectra were measured on a UV-visible spectrophotometer (Shimadzu, Multispec-1500). All measurements were performed at 25 °C using a 10 mm path length quartz cell in an aerated condition, after the solution was stirred for 20 min.  $^1\text{H}$  and  $^{13}\text{C}$  NMR spectra were recorded on JEOL JNM-AL400 and JEOL JNM-GSX270 Excalibur with TMS as standard. FAB-MS spectra were obtained from JEOL JMS 700 Mass spectrometer. IR spectra were measured on an FT-IR-610 infrared spectrophotometer (Jasco Corp.) with KBr disk. ESR spectra were performed at the X-band using a Bruker EMX-10/12 spectrometer with a 100 kHz magnetic field modulation at a microwave power level of 20 mW.  $\Phi_F$  was determined with rhodamine B as a standard ( $\Phi_F = 0.69$  in ethanol) (C. A. Parker and W. T. Rees, *Analyst*, 1960, **85**, 587).

## Synthesis

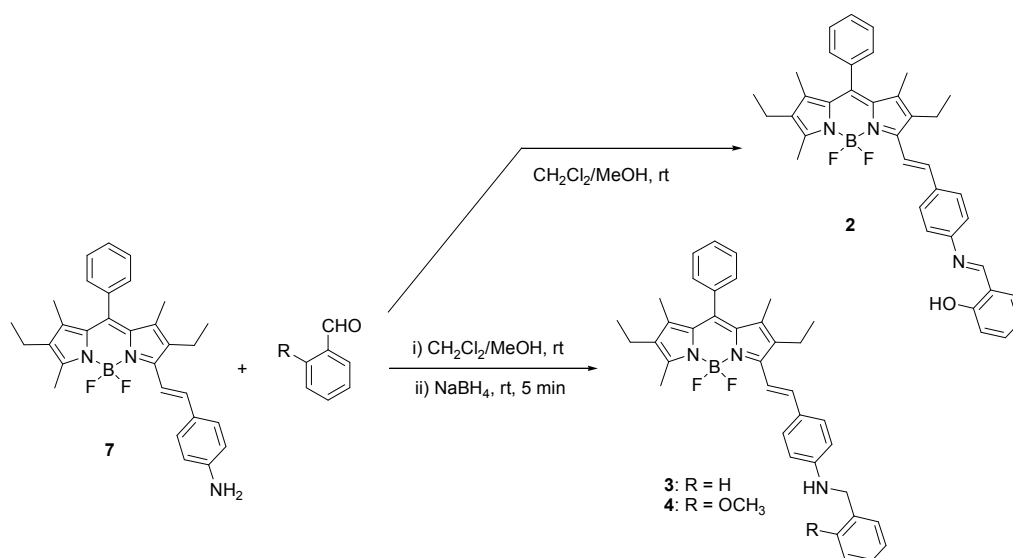

Compound **2**: **7**<sup>10</sup> (48.3 mg, 0.1 mmol) and salicylaldehyde (122.1 mg, 1 mmol) were stirred in a mixture of  $\text{CH}_2\text{Cl}_2$  (15 mL) and MeOH (10 mL) at room temperature until the complete disappearance of **7** by TLC monitoring. The solution was concentrated to ca. 4 mL. The solid formed was recovered by filtration and washed with MeOH (5 mL  $\times$  3), affording **2** as a gray green solid (47.5 mg, 81%).  $^1\text{H}$  NMR ( $\text{CDCl}_3$ , 400 MHz):  $\delta$  13.25 (s, 1H, PhOH), 8.66 (s, 1H, N=CH), 7.74 (d, 1H,  $J = 16.6$ , CH=CH), 7.65 (d, 2H,  $J = 8.5$ , PhH of styryl), 7.54–7.46 (m, 3H, PhH), 7.44–7.35 (m, 2H, PhHOH), 7.34–7.27 (m, 4H, PhH and PhH of styryl), 7.21 (d, 1H,  $J = 16.8$ , CH=CH), 7.03 (d, 1H,  $J = 8.3$ , PhHOH), 6.94 (t, 1H,  $J = 7.6$ , PhHOH),

2.65–2.56 (m, 5H,  $\text{CH}_3\text{CH}_2$  and  $\text{CH}_3$ ), 2.32 (q, 2H,  $J = 7.6$ ,  $\text{CH}_3\text{CH}_2$ ), 1.32 (s, 3H,  $\text{CH}_3$ ), 1.30 (s, 3H,  $\text{CH}_3$ ), 1.16 (t, 3H,  $J = 7.6$ ,  $\text{CH}_3\text{CH}_2$ ), 1.00 (t, 3H,  $J = 7.6$ ,  $\text{CH}_3\text{CH}_2$ ).  $^{13}\text{C}$  NMR (DMSO- $d_6$ , 67.5 MHz):  $\delta$  161.79, 161.01, 155.90, 148.23, 147.92, 139.41, 139.06, 138.11, 136.33, 135.64, 133.73, 133.51, 132.96, 132.88, 132.11, 131.70, 128.86, 128.65, 128.24, 128.01, 121.41, 120.15, 119.14, 118.89, 117.45, 117.10, 18.31, 17.11, 14.45, 14.11, 12.83, 11.75, 11.33. MS (FAB):  $m/z$  Calcd for  $\text{C}_{37}\text{H}_{36}\text{BF}_2\text{N}_3\text{O}$ : 587.3; Found: 587.2. HRMS (FAB):  $m/z$  Calcd for  $\text{C}_{37}\text{H}_{36}\text{BF}_2\text{N}_3\text{O}$ : 587.2919; Found: 589.2926.

Compounds **3** and **4**: **7**<sup>10</sup> (48.3 mg, 0.1 mmol) was dissolved in a mixture of  $\text{CH}_2\text{Cl}_2$  (15 mL) and MeOH (10 mL). Benzaldehyde (106 mg, 1 mmol for **3**) or *o*-anisaldehyde (136 mg, 1 mmol for **4**) was added to the solution and stirred at room temperature until the complete disappearance of **7** by a TLC monitoring.  $\text{NaBH}_4$  (76 mg, 2 mmol) was added to the solution and stirred for 5 min. The solution was washed with water and brine, dried over anhydrous  $\text{Na}_2\text{SO}_4$ , and concentrated by evaporation. The crude product was purified by column chromatography on silica gel using  $\text{CH}_2\text{Cl}_2/n$ -hexane (2/1 v/v for **3**) or ethyl acetate/*n*-hexane (1/3 v/v for **4**) as eluent.

**3**: (42.4 mg, 78%, brown solid).  $^1\text{H}$  NMR (DMSO- $d_6$ , 400 MHz):  $\delta$  7.59–7.53 (m, 3H, PhH), 7.40–7.29 (m, 9H, PhH, BnH, PhH of styryl and  $\text{CH}=\text{CH}$ ), 7.23 (t, 1H,  $J = 6.8$ , BnH), 7.16 (d, 1H,  $J = 16.6$ ,  $\text{CH}=\text{CH}$ ), 6.85 (t, 1H,  $J = 6.1$ ,  $\text{CH}_2\text{NH}$ ), 6.66 (d, 2H,  $J = 8.5$ , PhH of styryl), 4.34 (d, 2H,  $J = 6.1$ ,  $\text{CH}_2\text{NH}$ ), 2.56 (q, 2H,  $J = 7.3$ ,  $\text{CH}_3\text{CH}_2$ ), 2.46 (s, 3H,  $\text{CH}_3$ ), 2.30 (q, 2H,  $J = 7.6$ ,  $\text{CH}_3\text{CH}_2$ ), 1.27 (s, 3H,  $\text{CH}_3$ ), 1.25 (s, 3H,  $\text{CH}_3$ ), 1.06 (t, 3H,  $J = 7.3$ ,  $\text{CH}_3\text{CH}_2$ ), 0.94 (t, 3H,  $J = 7.6$ ,  $\text{CH}_3\text{CH}_2$ ).  $^{13}\text{C}$  NMR (DMSO- $d_6$ , 67.5 MHz):  $\delta$  152.06, 149.82, 149.59, 139.38, 138.29, 138.08, 136.80, 136.16, 134.73, 132.44, 132.32, 130.93, 130.23, 128.82, 128.73, 128.18, 128.00, 126.86, 126.41, 124.27, 113.37, 112.26, 45.96, 17.62, 16.33, 14.39, 13.71, 12.22, 11.15, 10.95. MS (FAB):  $m/z$  Calcd for  $\text{C}_{37}\text{H}_{38}\text{BF}_2\text{N}_3$ : 573.3; Found: 573.2. HRMS (FAB):  $m/z$  Calcd for  $\text{C}_{37}\text{H}_{38}\text{BF}_2\text{N}_3$ : 573.3127; Found: 573.3133.

**4**: (45.9 mg, 76%, brown solid).  $^1\text{H}$  NMR (DMSO- $d_6$ , 400 MHz):  $\delta$  7.58–7.53 (m, 3H, PhH), 7.40–7.29 (m, 5H, PhH, PhH of styryl and  $\text{CH}=\text{CH}$ ), 7.26–7.20 (m, 2H, PhHOMe), 7.16 (d, 1H,  $J = 16.6$ ,  $\text{CH}=\text{CH}$ ), 7.01 (d, 1H,  $J = 8.1$ , PhHOMe), 6.88 (t, 1H,  $J = 7.3$ , PhHOMe), 6.67 (t, 1H,  $J = 6.1$ ,  $\text{CH}_2\text{NH}$ ), 6.63 (d, 2H,  $J = 8.5$ , PhH of styryl), 4.29 (d, 2H,  $J = 6.1$ ,  $\text{CH}_2\text{NH}$ ), 3.85 (s, 3H, OCH<sub>3</sub>), 2.56 (q, 2H,  $J = 7.6$ ,  $\text{CH}_3\text{CH}_2$ ), 2.46 (s, 3H,  $\text{CH}_3$ ), 2.30 (q, 2H,  $J = 7.6$ ,  $\text{CH}_3\text{CH}_2$ ), 1.27 (s, 3H,  $\text{CH}_3$ ), 1.25 (s, 3H,  $\text{CH}_3$ ), 1.07 (t, 3H,  $J = 7.6$ ,  $\text{CH}_3\text{CH}_2$ ), 0.94 (t, 3H,  $J = 7.8$ ,  $\text{CH}_3\text{CH}_2$ ).  $^{13}\text{C}$  NMR (DMSO- $d_6$ , 67.5 MHz):  $\delta$  156.55, 151.99, 149.87, 149.73, 138.29, 138.03, 136.76, 136.24, 134.74, 132.45, 132.30, 130.94, 130.22, 128.82, 128.74, 128.23, 128.01, 127.68, 127.53, 126.54, 124.15, 119.85, 113.25, 112.08, 110.35, 55.19, 40.79, 17.63, 16.33, 14.39, 13.72, 12.21, 11.15, 10.96. MS (FAB):  $m/z$  Calcd for  $\text{C}_{38}\text{H}_{40}\text{BF}_2\text{N}_3\text{O}$ : 603.3; Found: 603.2. HRMS (FAB):  $m/z$  Calcd for  $\text{C}_{38}\text{H}_{40}\text{BF}_2\text{N}_3\text{O}$ : 603.3232; Found: 603.3239.

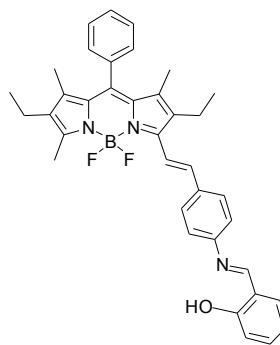

2

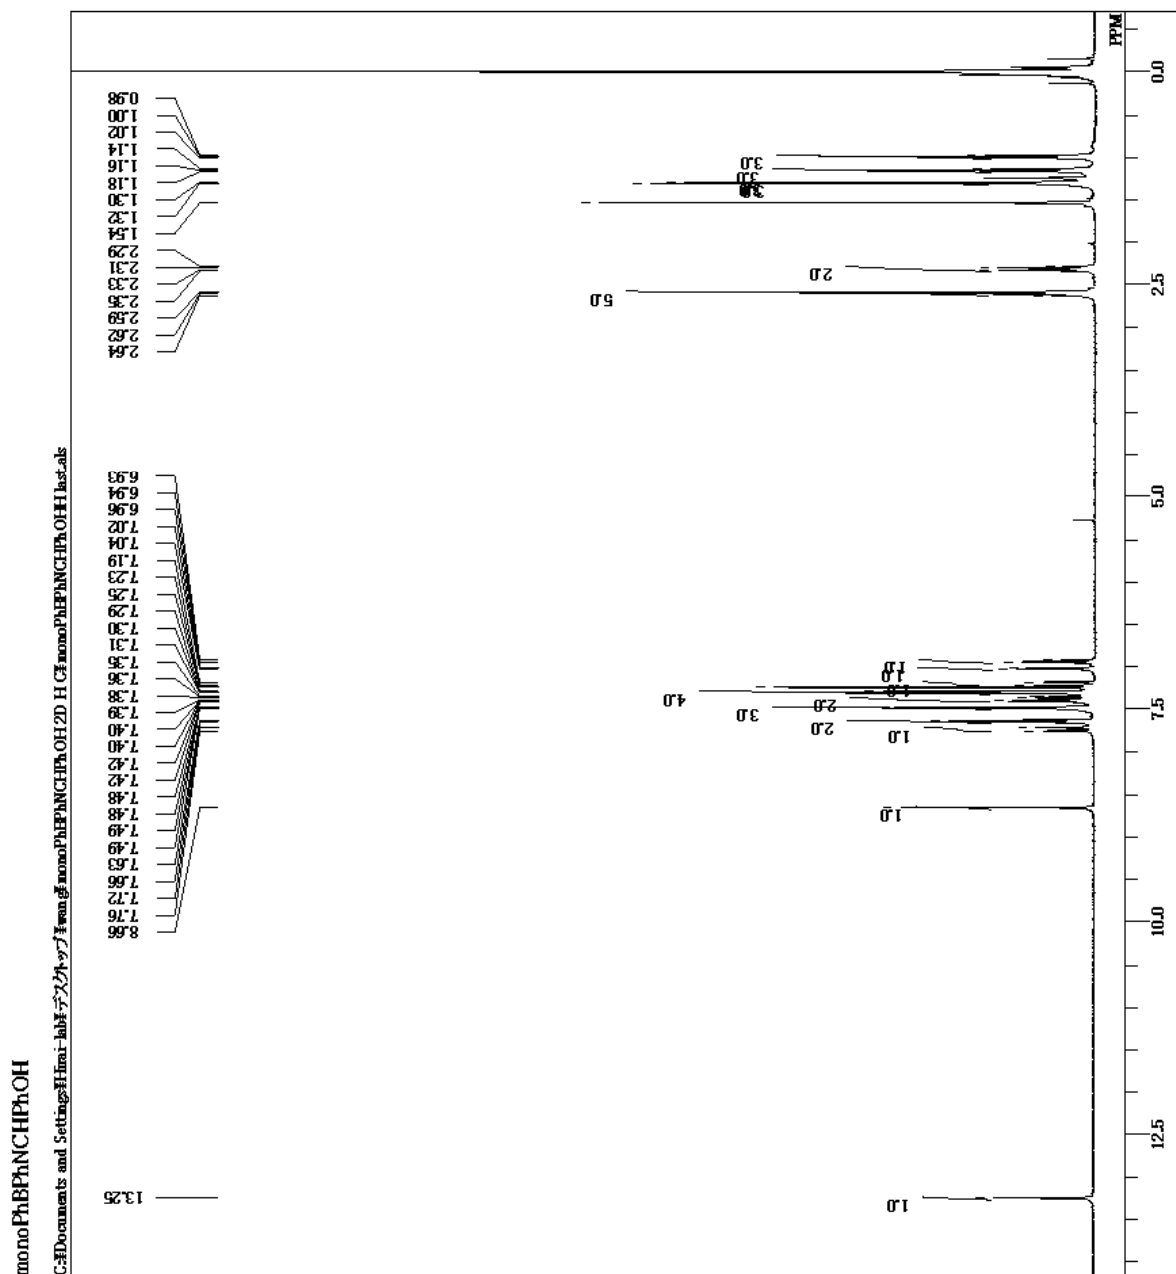

4S



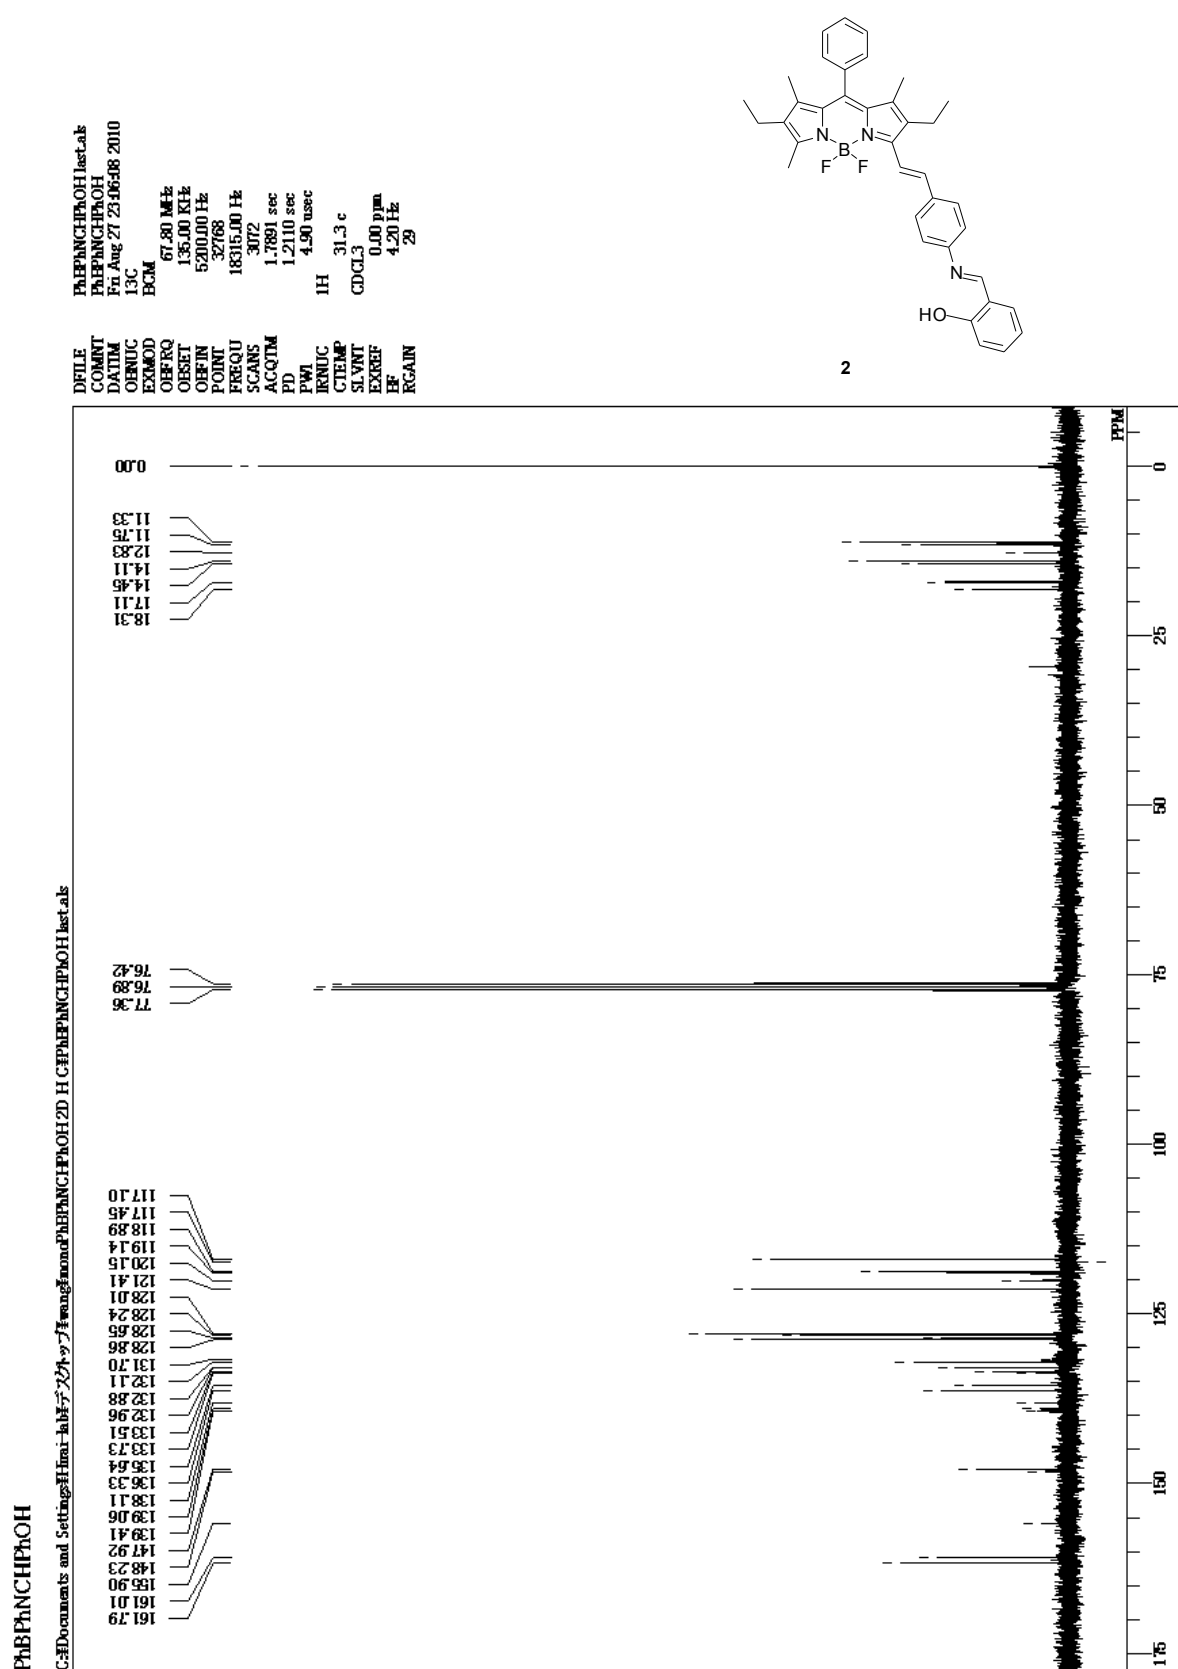

Fig. S3 <sup>13</sup>C NMR chart of **2** in CDCl<sub>3</sub> (67.5 MHz).

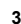

7S

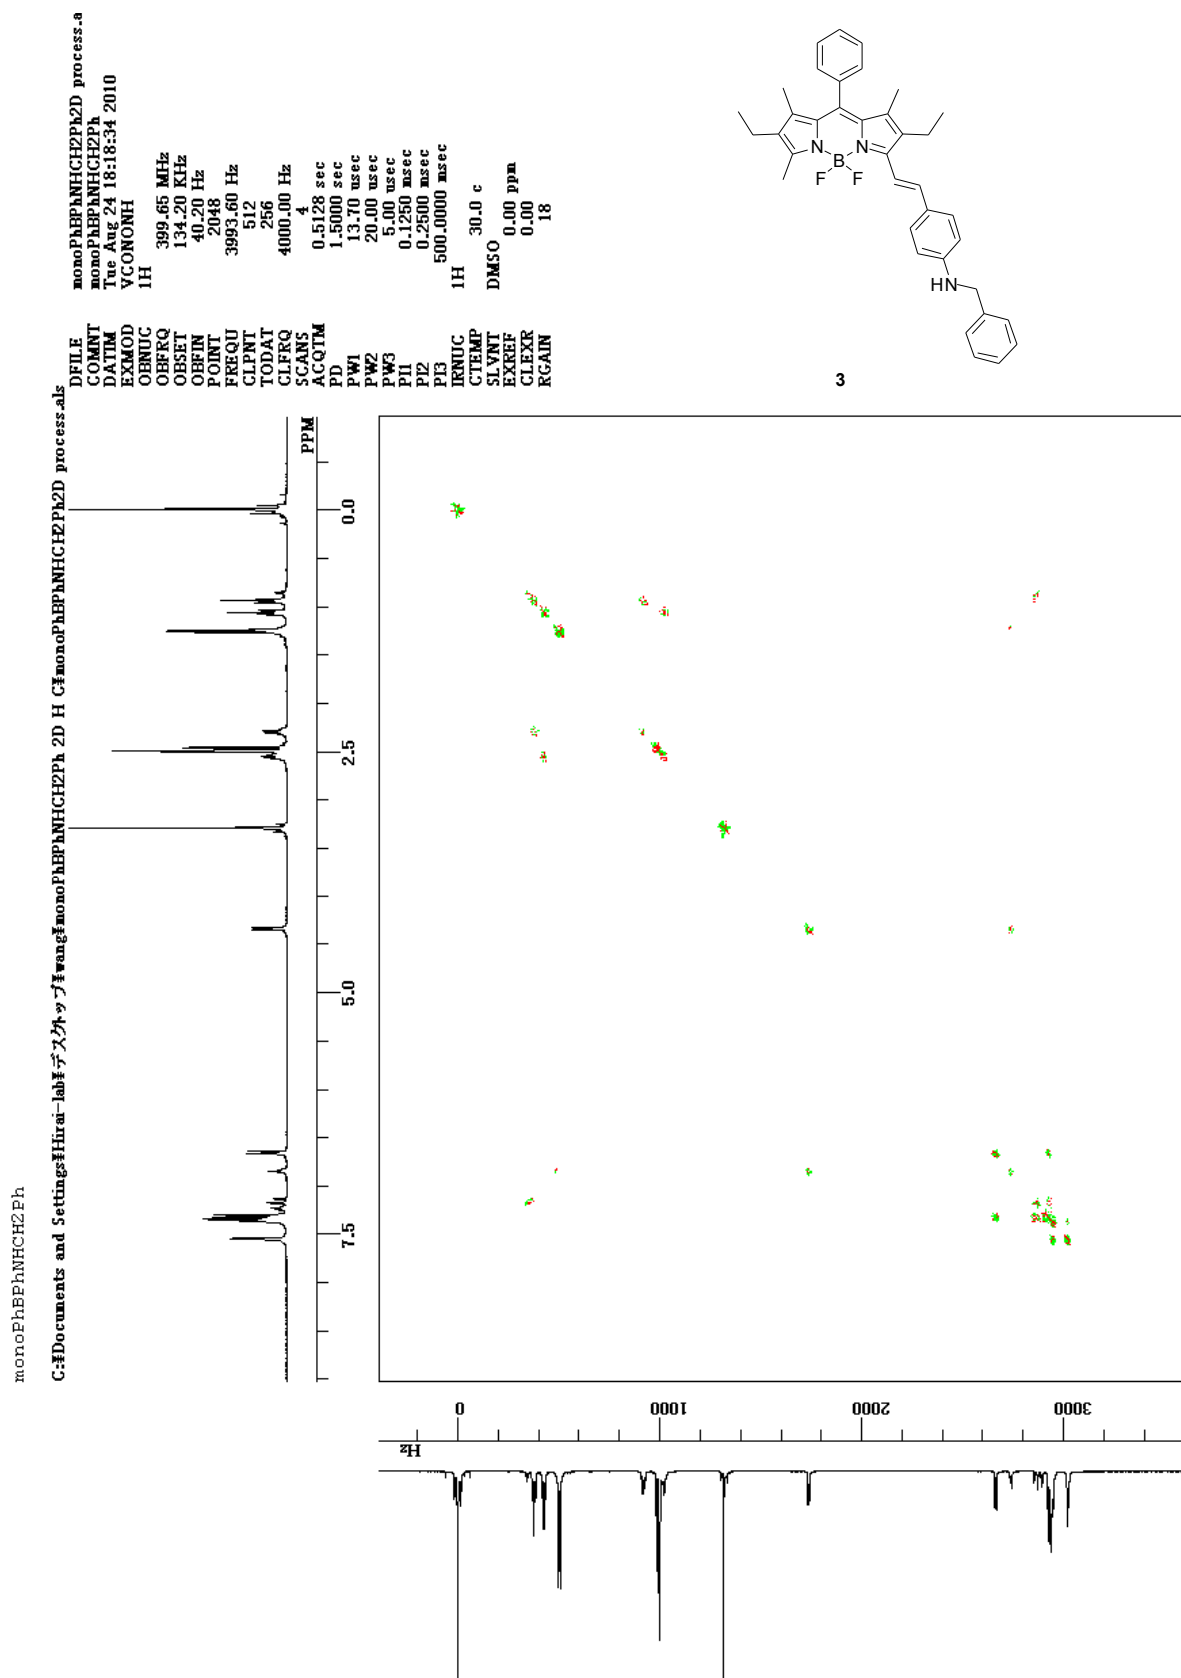

**Fig. S5** gCOSY chart of **3** in DMSO-d<sub>6</sub> (400 MHz).

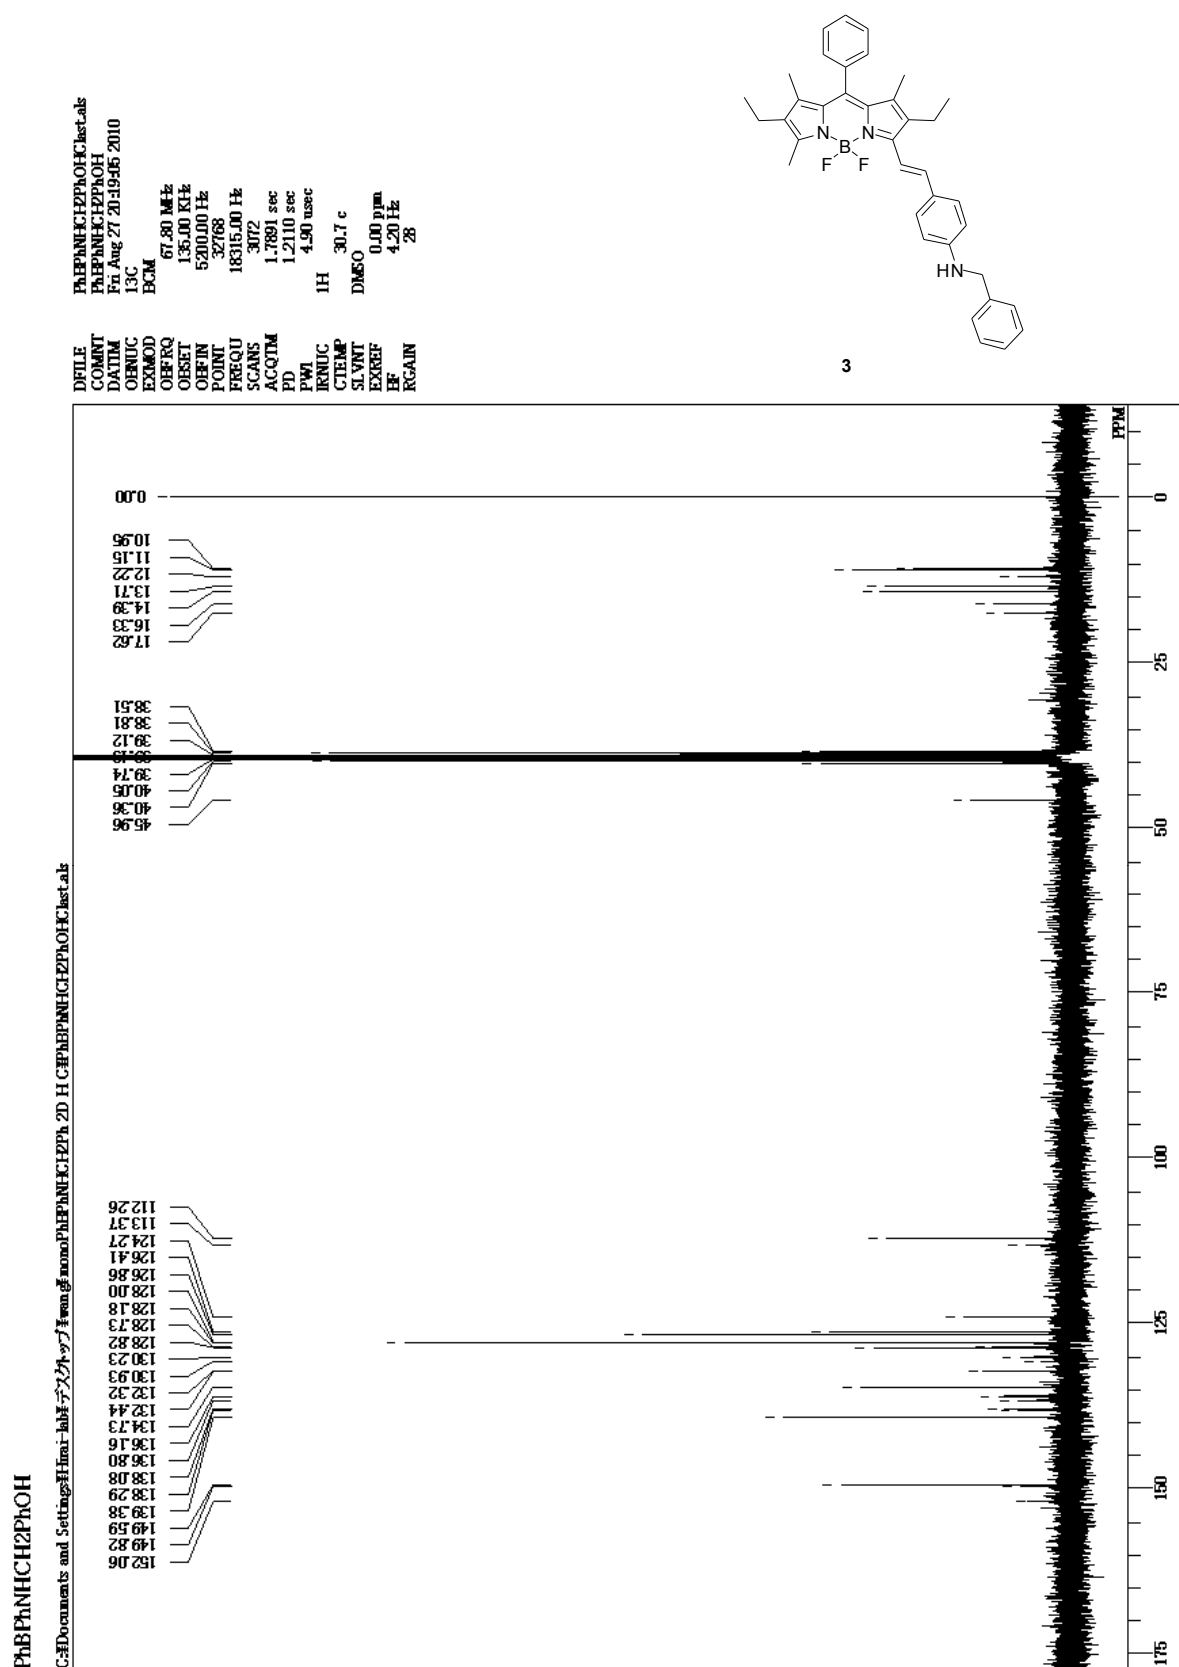

Fig. S6 <sup>13</sup>C NMR chart of **3** in DMSO-d<sub>6</sub> (67.5 MHz).

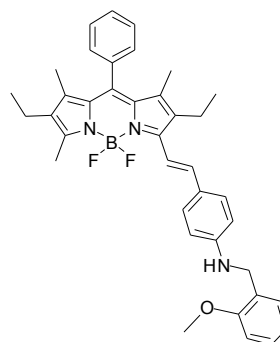

4

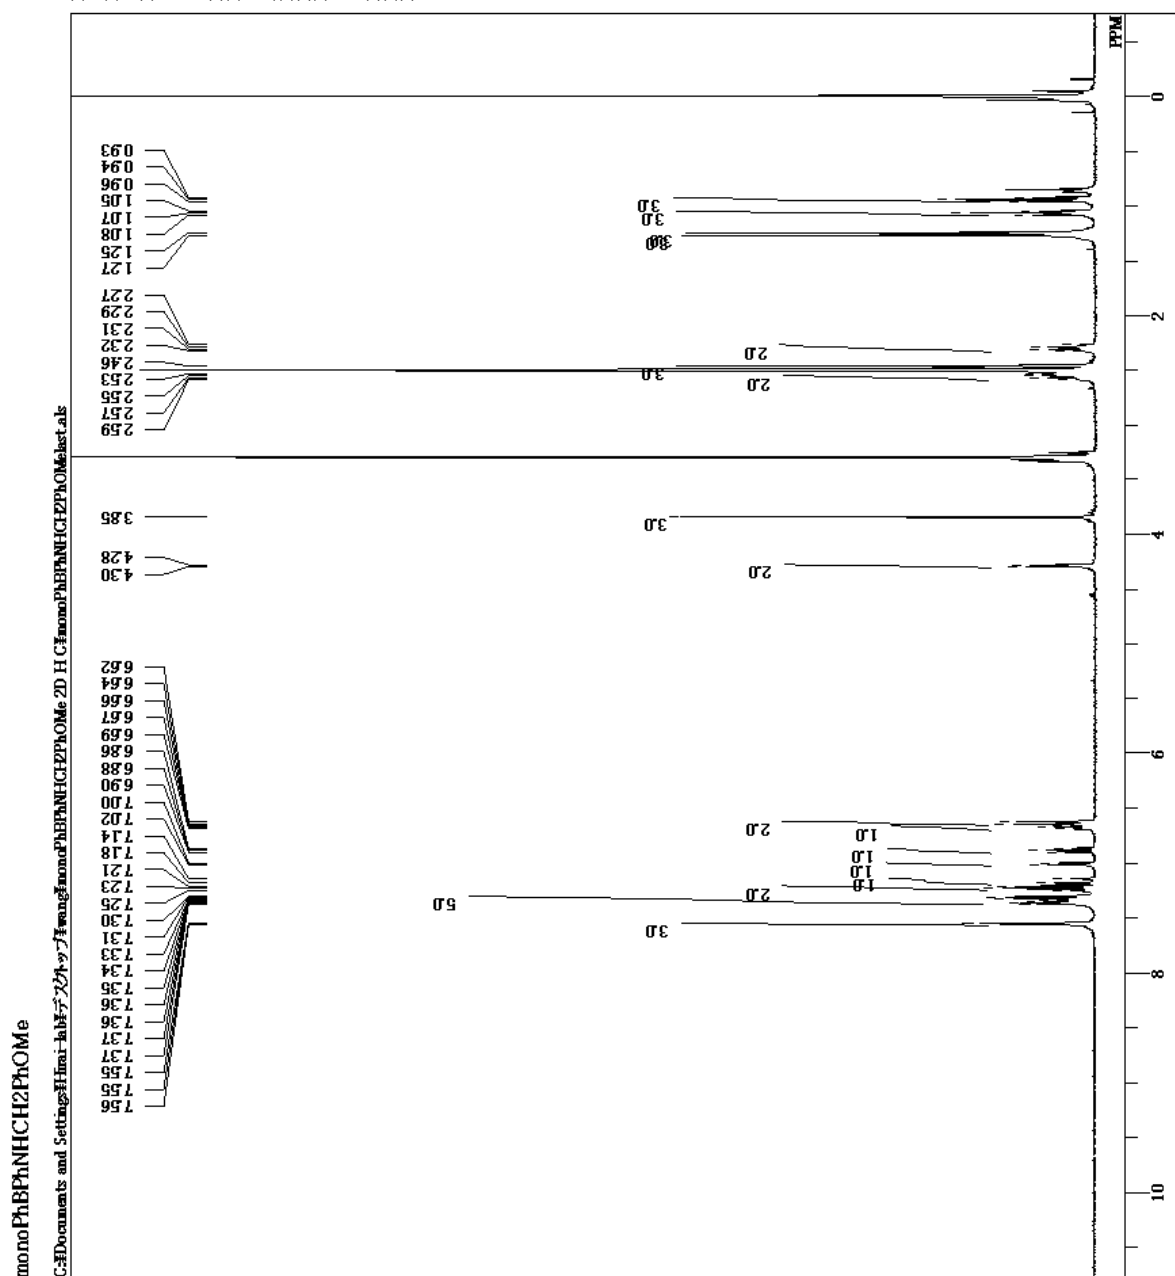

10S

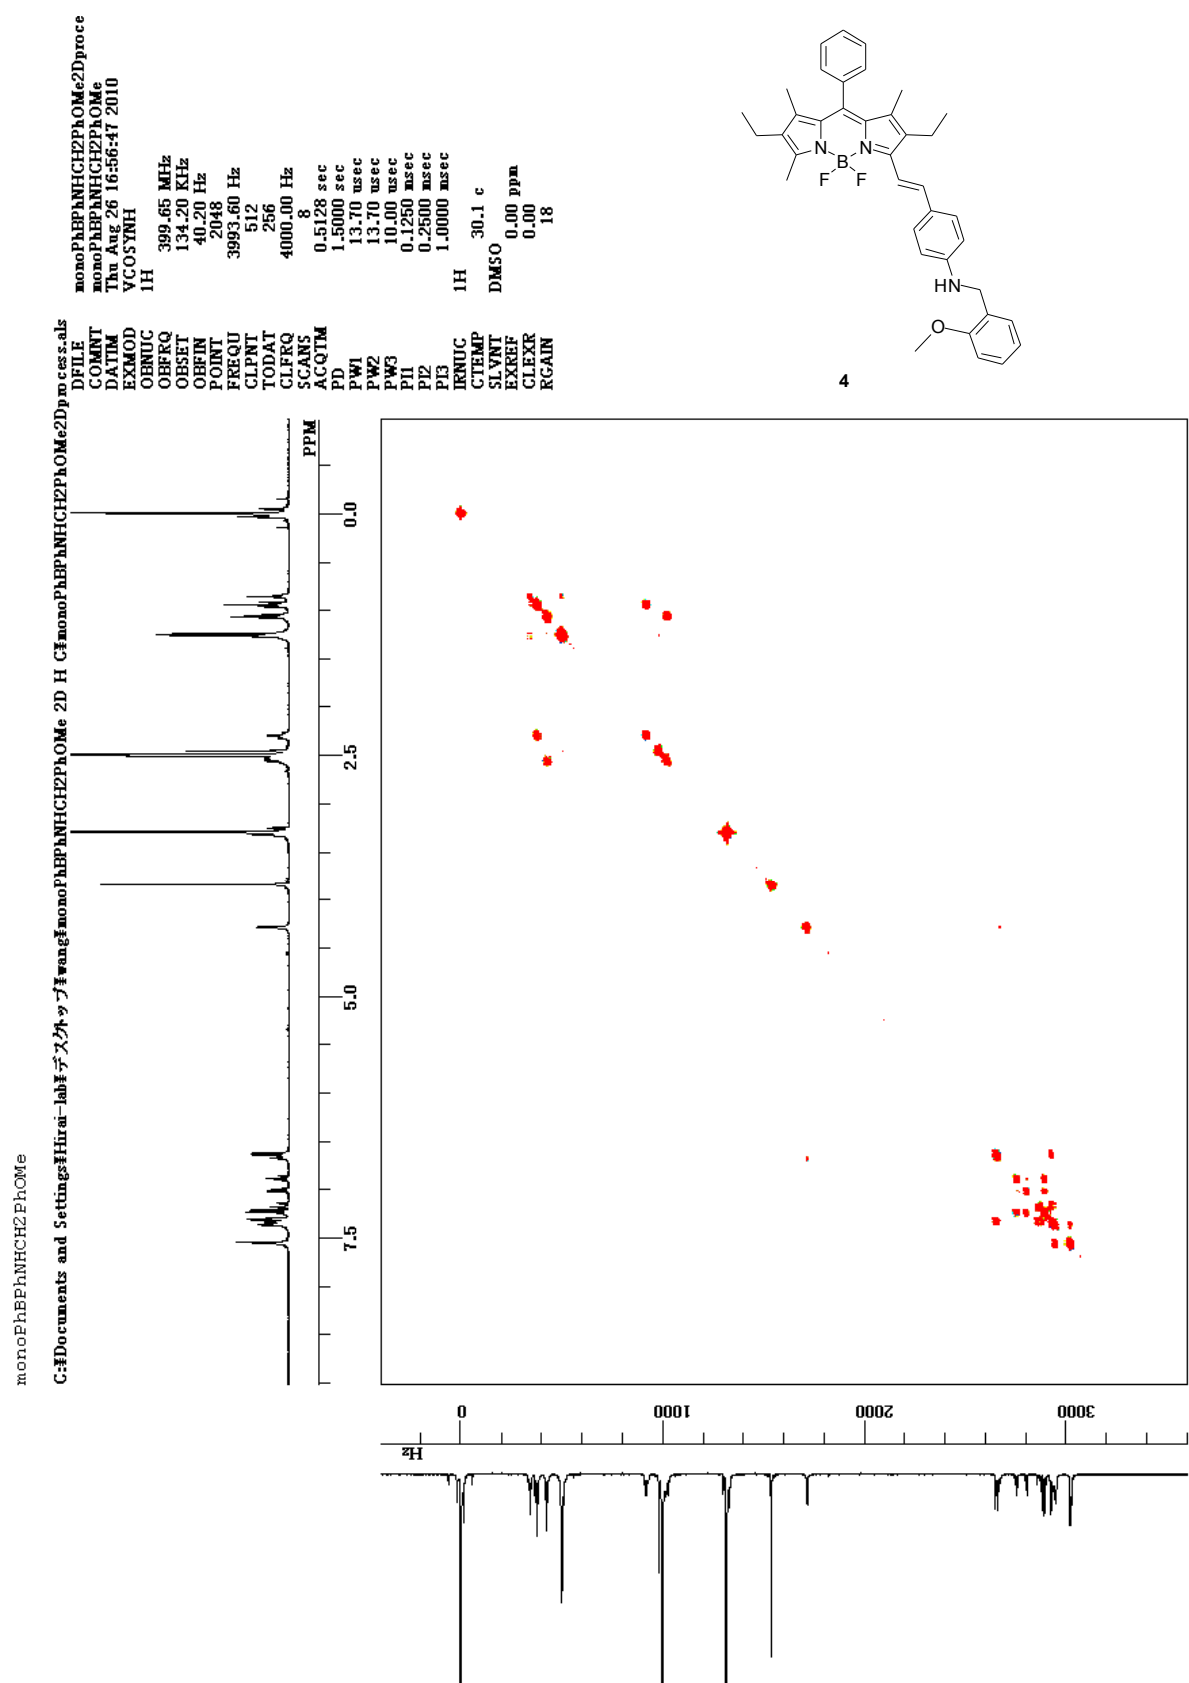

Fig. S8 gCOSY chart of **4** in DMSO-d<sub>6</sub> (400 MHz).

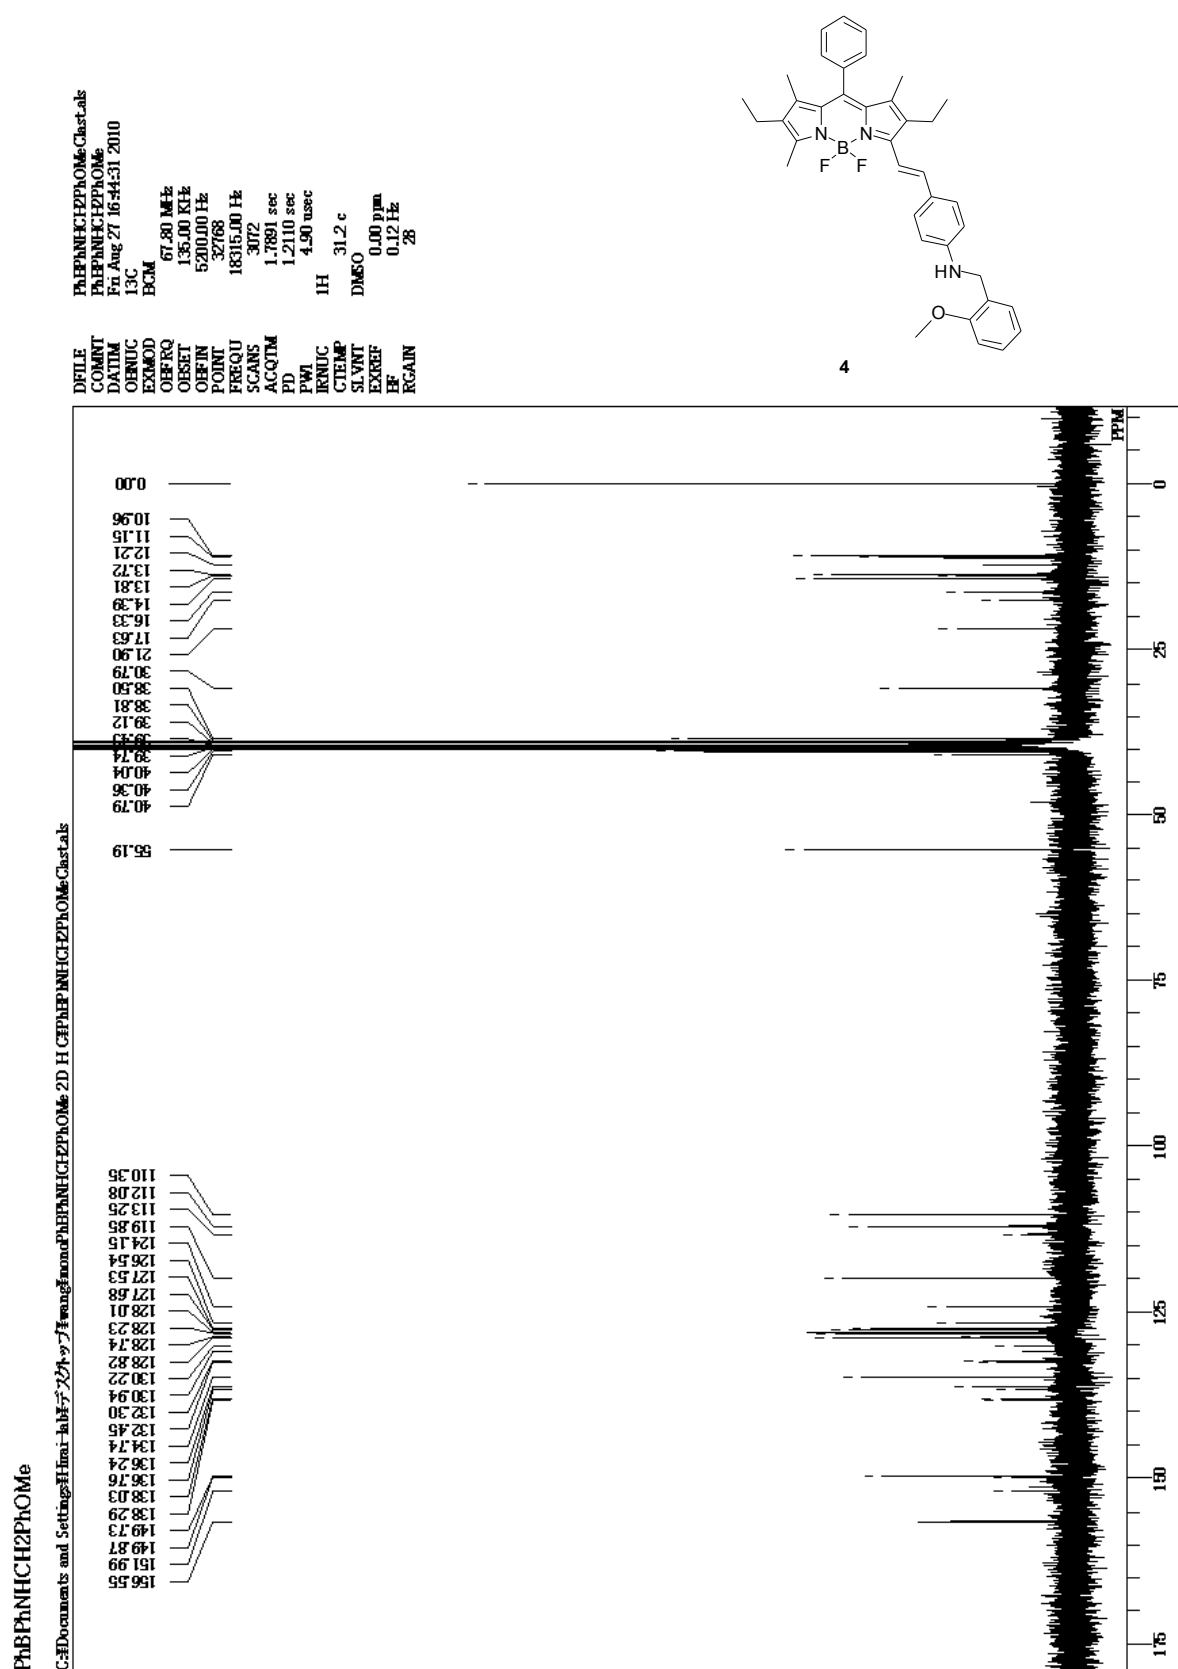

Fig. S9  $^{13}\text{C}$  NMR chart of **4** in DMSO- $\text{d}_6$  (67.5 MHz).

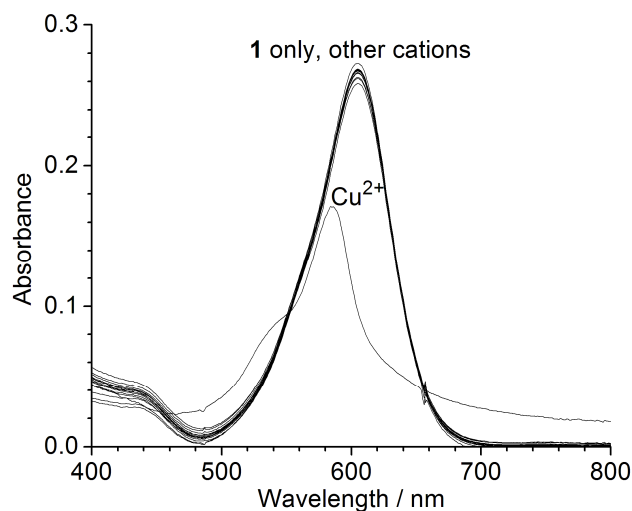

**Fig. S10** Absorption spectra of **1** (5  $\mu\text{M}$ ) measured in a buffered MeCN/water mixture (1/1 v/v; HEPES 100 mM; pH 7.0) with respective metal cations (20 equiv).

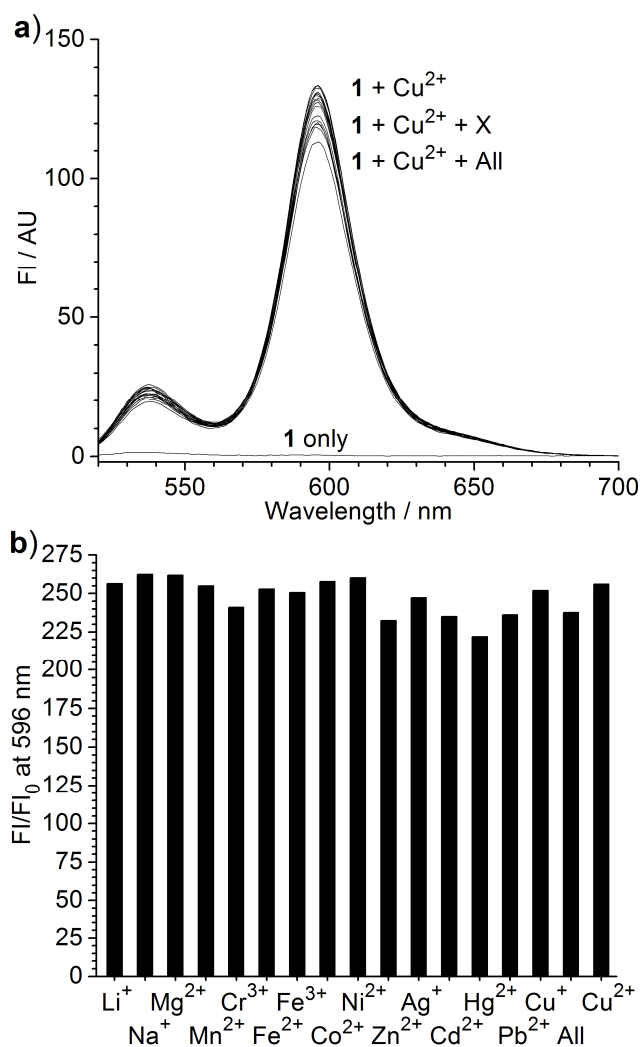

**Fig. S11** (a) Fluorescence spectra ( $\lambda_{\text{ex}} = 510 \text{ nm}$ ) of **1** (5  $\mu\text{M}$ ) in a buffered MeCN/water mixture (1/1 v/v; HEPES 100 mM; pH 7.0) measured with 20 equiv of  $\text{Cu}^{2+}$  and 20 equiv of other respective metal cations (X). (b) The ratio of fluorescence intensity (FI/FI<sub>0</sub>) of **1**, where FI and FI<sub>0</sub> are the intensity measured with  $\text{Cu}^{2+}$  and X and without metal cations, respectively.

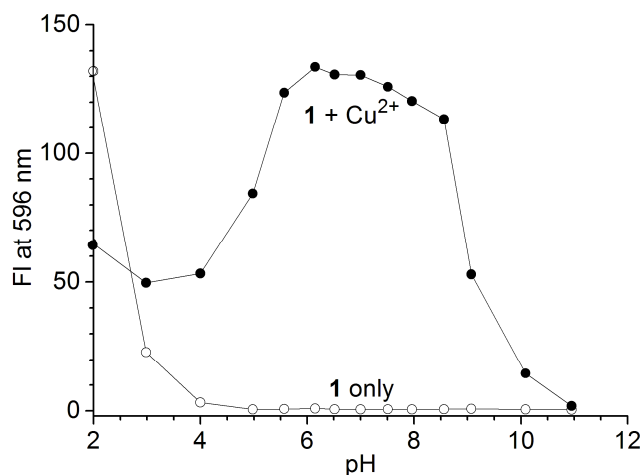

**Fig. S12** pH-dependent change in fluorescence intensity ( $\lambda_{\text{ex}} = 510 \text{ nm}$ ) of **1** ( $5 \mu\text{M}$ ) in a MeCN/water mixture (1/1 v/v) measured with and without  $\text{Cu}^{2+}$  (20 equiv). pH of the solution was adjusted with NaOH and HCl.

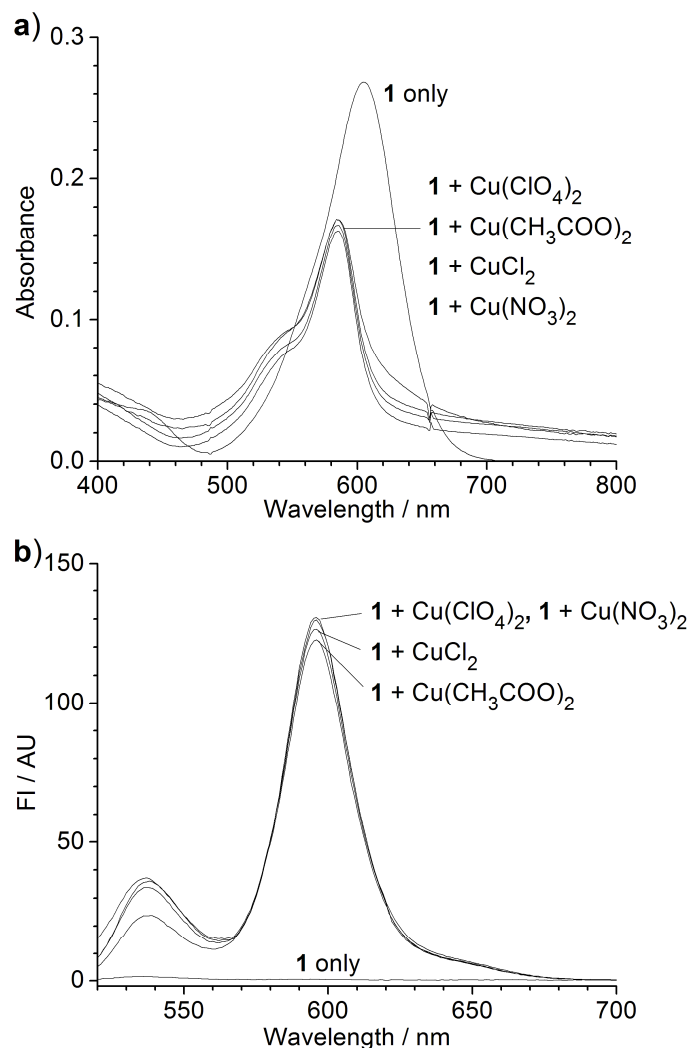

**Fig. S13** (a) Absorption and (b) fluorescence spectra ( $\lambda_{\text{ex}} = 510 \text{ nm}$ ) of **1** ( $5 \mu\text{M}$ ) in a buffered MeCN/water mixture (1/1 v/v; HEPES 100 mM; pH 7.0) measured with 20 equiv of  $\text{Cu}(\text{ClO}_4)_2$ ,  $\text{Cu}(\text{CH}_3\text{COO})_2$ ,  $\text{CuCl}_2$ , and  $\text{Cu}(\text{NO}_3)_2$ .

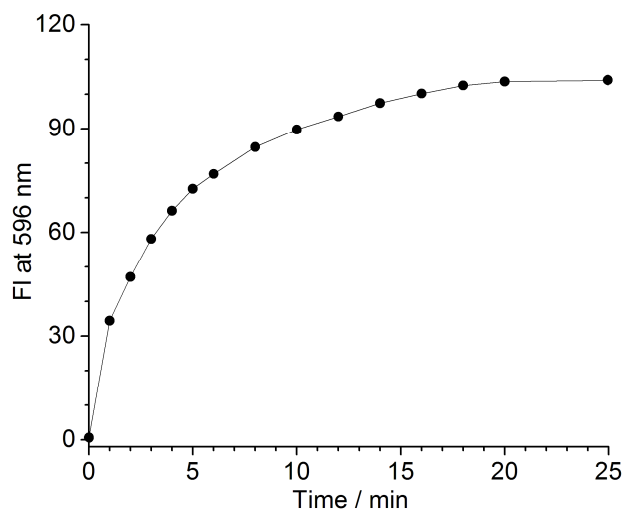

**Fig. S14** Time-dependent change in fluorescence intensity ( $\lambda_{\text{ex}} = 510 \text{ nm}$ ) of **1** ( $5 \mu\text{M}$ ) in a buffered MeCN/water mixture (1/1 v/v; HEPES 100 mM; pH 7.0) upon addition of 10 equiv of  $\text{Cu}^{2+}$ .

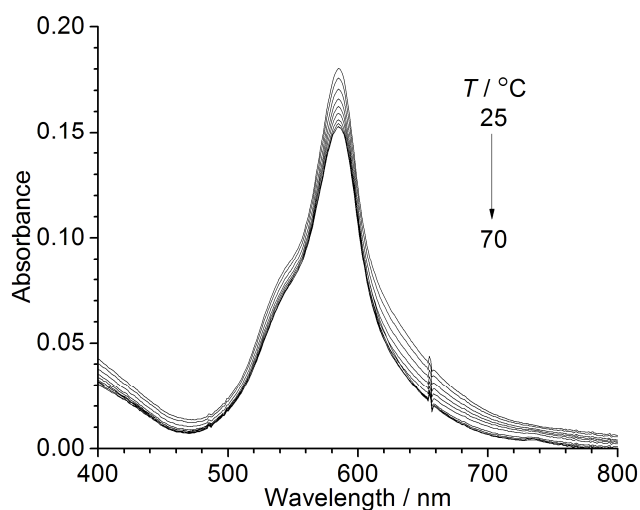

**Fig. S15** Temperature-dependent change in absorption spectra ( $\lambda_{\text{ex}} = 510 \text{ nm}$ ) of **1** ( $5 \mu\text{M}$ ) in a buffered MeCN/water mixture (1/1 v/v; HEPES 100 mM; pH 7.0) with 10 equiv of  $\text{Cu}^{2+}$ . The measurements were carried out during a heating sequence after stirring the solution at  $25 \text{ }^{\circ}\text{C}$  for 20 min.

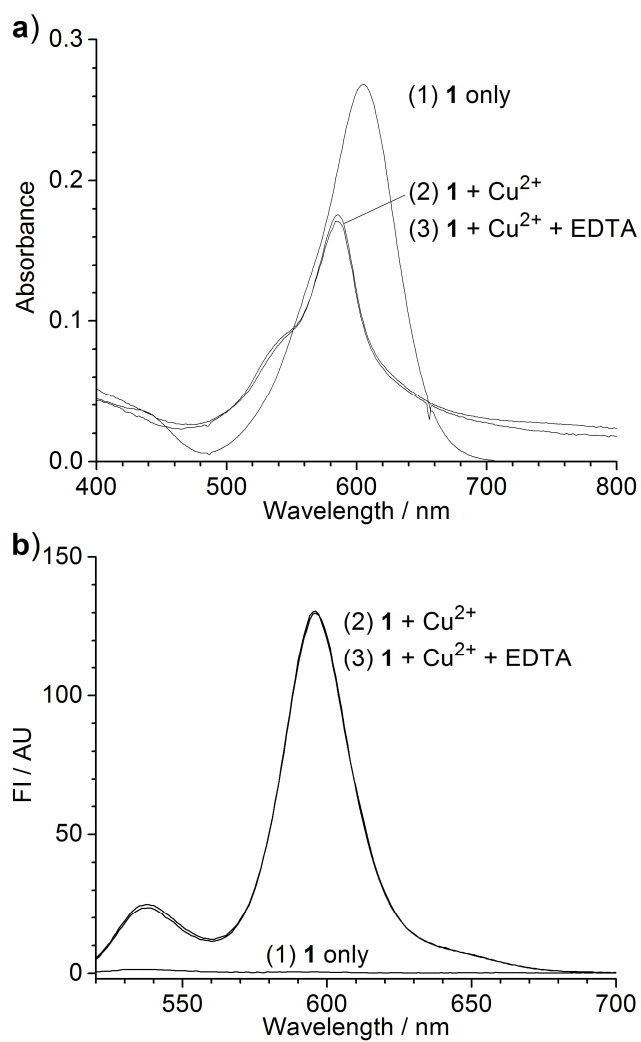

**Fig. S16** (a) Absorption and (b) fluorescence spectra ( $\lambda_{\text{ex}} = 510 \text{ nm}$ ) of **1** ( $5 \mu\text{M}$ ) in a buffered MeCN/water mixture (1/1 v/v; HEPES 100 mM; pH 7.0) measured (1) without cations, (2) with  $\text{Cu}^{2+}$  (20 equiv), and (3) after addition of EDTA (100 equiv) to the sample (2).

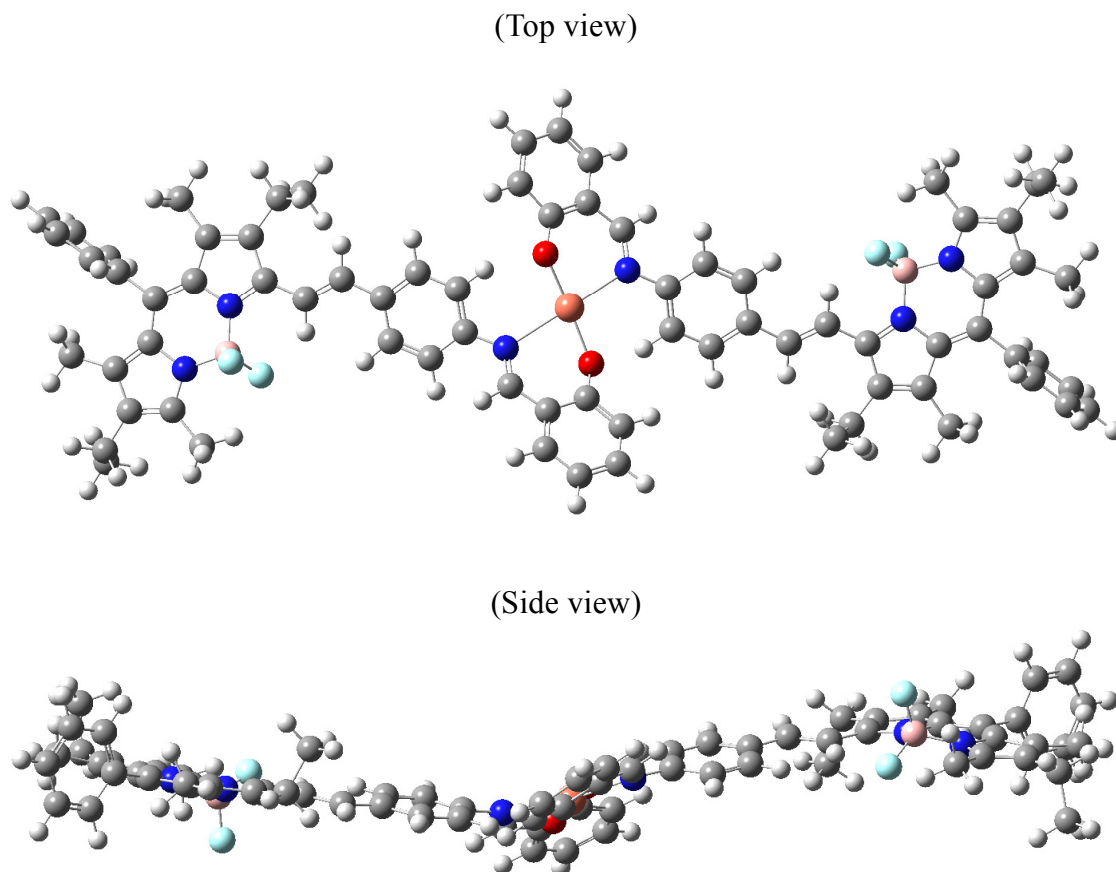

**Fig. S17** Geometry optimized structure of  $1\text{-Cu}^+$  2:1 complex determined by *ab initio* calculation within the Gaussian 03 program at the DFT level (B3LYP/3-21 basis set for all atoms except for Cu, for which LANL2DZ basis set with effective core potential was used).

**Cartesian Coordinates (in Å) of  $1\text{-Cu}^+$  2:1 complex**

|    |           |           |          |   |            |          |           |
|----|-----------|-----------|----------|---|------------|----------|-----------|
| C  | -5.636324 | -0.938997 | 0.564627 | C | -12.325451 | 3.578799 | -0.354014 |
| C  | -5.882397 | 0.437548  | 0.779223 | C | -10.078029 | 2.374999 | 0.055512  |
| C  | -4.775710 | 1.249133  | 1.133462 | C | -15.739231 | 2.518896 | -2.217287 |
| C  | -3.503937 | 0.728759  | 1.281438 | H | -13.983836 | 1.402251 | -2.798518 |
| C  | -3.273187 | -0.649034 | 1.093647 | H | -14.910792 | 1.352873 | 1.386217  |
| C  | -4.366530 | -1.467770 | 0.714712 | C | -16.261709 | 2.491578 | 0.143154  |
| N  | -1.973523 | -1.161960 | 1.257076 | C | -8.347122  | 0.410679 | 0.323083  |
| C  | -0.637345 | -3.130626 | 1.894583 | H | -12.749539 | 3.605070 | -1.363501 |
| C  | 0.603702  | -2.741805 | 1.277814 | H | -11.749866 | 4.495027 | -0.200197 |
| C  | 1.711782  | -3.630602 | 1.461688 | H | -13.166567 | 3.577535 | 0.345810  |
| C  | 1.599341  | -4.807321 | 2.168101 | C | -9.193687  | 3.596664 | 0.059173  |
| C  | 0.370704  | -5.186214 | 2.756791 | C | -16.559304 | 2.911014 | -1.156249 |
| C  | -0.716169 | -4.349339 | 2.614932 | H | -15.966280 | 2.842020 | -3.226958 |
| O  | 0.744419  | -1.652361 | 0.562120 | H | -16.895109 | 2.793837 | 0.969483  |
| Cu | 0.052928  | 0.130813  | 0.888066 | C | -7.187272  | 1.049233 | 0.642391  |

|   |            |           |           |   |            |           |           |
|---|------------|-----------|-----------|---|------------|-----------|-----------|
| O | -0.705995  | 1.841372  | 1.417261  | H | -8.337262  | -0.656449 | 0.144420  |
| C | -0.527350  | 3.048518  | 0.943335  | C | -8.413080  | 3.752812  | -1.273640 |
| C | -1.523253  | 4.054619  | 1.171169  | H | -8.493020  | 3.560404  | 0.899789  |
| C | -1.396273  | 5.338764  | 0.693436  | H | -9.811832  | 4.487309  | 0.212915  |
| C | -0.262473  | 5.724003  | -0.059120 | H | -17.423485 | 3.539016  | -1.340247 |
| C | 0.719203   | 4.787051  | -0.297729 | H | -7.198471  | 2.115544  | 0.837964  |
| C | 0.628046   | 3.455548  | 0.186866  | H | -7.769038  | 4.639340  | -1.245202 |
| C | 1.735007   | 2.597149  | -0.092392 | H | -9.116898  | 3.855435  | -2.105827 |
| N | 1.902356   | 1.332146  | 0.224484  | H | -7.789231  | 2.873589  | -1.456832 |
| C | 3.186801   | 0.775301  | 0.019377  | H | 16.593287  | 1.928328  | -0.019073 |
| C | 4.368533   | 1.531379  | 0.222397  | C | 15.909064  | 1.082824  | -0.139150 |
| C | 5.618673   | 0.983561  | -0.004914 | H | 16.171216  | 0.552274  | -1.059157 |
| C | 5.758370   | -0.353144 | -0.443631 | H | 16.078000  | 0.387491  | 0.691467  |
| C | 4.572023   | -1.109110 | -0.608407 | C | 14.485706  | 1.572313  | -0.168481 |
| C | 3.318790   | -0.572084 | -0.372155 | C | 14.071991  | 2.890612  | 0.099390  |
| H | -4.937190  | 2.311914  | 1.289148  | C | 13.304521  | 0.815273  | -0.452266 |
| H | -2.647392  | 1.343789  | 1.533320  | C | 12.661086  | 2.931329  | -0.022983 |
| H | -4.193567  | -2.517324 | 0.508492  | C | 14.940262  | 4.055493  | 0.498584  |
| H | 2.655147   | -3.334068 | 1.020279  | N | 12.206567  | 1.689574  | -0.353223 |
| H | 2.465280   | -5.453106 | 2.277994  | C | 13.098057  | -0.548277 | -0.732784 |
| H | 0.290033   | -6.114121 | 3.310162  | C | 11.740499  | 4.104878  | 0.119073  |
| H | -1.671022  | -4.617297 | 3.060313  | C | 15.143670  | 4.131665  | 2.035593  |
| H | -2.390284  | 3.762090  | 1.750425  | H | 14.485856  | 4.990012  | 0.148145  |
| H | -2.175713  | 6.067045  | 0.895542  | H | 15.918908  | 3.975520  | 0.009718  |
| H | -0.169683  | 6.735826  | -0.434602 | B | 10.745049  | 1.319531  | -0.736135 |
| H | 1.603694   | 5.060396  | -0.867473 | C | 11.806973  | -1.062780 | -0.847741 |
| H | 2.535897   | 3.093239  | -0.656839 | C | 14.283387  | -1.449878 | -0.863472 |
| H | 4.291202   | 2.545289  | 0.595946  | H | 12.174978  | 4.866589  | 0.771597  |
| H | 4.654188   | -2.146665 | -0.919585 | H | 10.786779  | 3.757809  | 0.518465  |
| H | 2.420251   | -1.175104 | -0.416530 | H | 11.544017  | 4.556126  | -0.863476 |
| H | -2.710102  | -2.822165 | 2.255116  | H | 15.771961  | 4.988350  | 2.308278  |
| C | -1.830546  | -2.350059 | 1.794845  | H | 15.621518  | 3.215851  | 2.398613  |
| H | 6.501652   | 1.589541  | 0.161684  | H | 14.176627  | 4.231647  | 2.539342  |
| H | -6.452536  | -1.590019 | 0.273660  | N | 10.680008  | -0.237932 | -0.698669 |
| H | -16.445155 | -2.268478 | -1.246382 | F | 10.425620  | 1.815083  | -2.010577 |
| C | -15.796056 | -1.391064 | -1.166596 | F | 9.850204   | 1.873586  | 0.223506  |
| H | -15.820240 | -0.861284 | -2.126038 | C | 11.331181  | -2.413722 | -1.036271 |
| H | -16.218163 | -0.715014 | -0.417010 | C | 14.902236  | -1.623502 | -2.108499 |
| C | -14.398075 | -1.816306 | -0.803655 | C | 14.793380  | -2.117109 | 0.257670  |
| C | -13.942741 | -3.147085 | -0.738466 | C | 9.541370   | -1.009602 | -0.753178 |
| C | -13.286098 | -0.979634 | -0.471151 | C | 12.183134  | -3.637569 | -1.242026 |
| C | -12.575779 | -3.115572 | -0.369342 | C | 9.941613   | -2.382273 | -0.979157 |
| C | -14.728381 | -4.394791 | -1.047779 | C | 16.015344  | -2.458628 | -2.230505 |
| N | -12.187784 | -1.818620 | -0.208621 | H | 14.506152  | -1.102654 | -2.972621 |
| C | -13.133302 | 0.419290  | -0.423135 | H | 14.312396  | -1.978080 | 1.219079  |

|   |            |           |           |   |           |           |           |
|---|------------|-----------|-----------|---|-----------|-----------|-----------|
| C | -11.642250 | -4.261774 | -0.123321 | C | 15.906862 | -2.951295 | 0.134101  |
| C | -14.680917 | -4.755905 | -2.556657 | C | 8.260580  | -0.405603 | -0.539238 |
| H | -15.773628 | -4.262786 | -0.742434 | H | 12.894430 | -3.491124 | -2.060061 |
| H | -14.331375 | -5.233351 | -0.463314 | H | 11.558624 | -4.503072 | -1.477643 |
| B | -10.818338 | -1.336068 | 0.348010  | H | 12.769021 | -3.870941 | -0.346387 |
| C | -11.885752 | 0.989785  | -0.176166 | C | 9.032369  | -3.583635 | -1.041903 |
| C | -14.321746 | 1.289098  | -0.679507 | C | 16.519390 | -3.124006 | -1.109696 |
| H | -11.957041 | -5.149347 | -0.678321 | H | 16.487572 | -2.589677 | -3.197534 |
| H | -11.615725 | -4.508877 | 0.947146  | H | 16.295032 | -3.465136 | 1.006268  |
| H | -10.634419 | -3.965159 | -0.416976 | C | 7.038195  | -0.983588 | -0.696755 |
| H | -15.256155 | -5.666824 | -2.762714 | H | 8.324147  | 0.616337  | -0.190068 |
| H | -13.645218 | -4.916150 | -2.873947 | C | 8.530744  | -4.006970 | 0.365193  |
| H | -15.094938 | -3.936453 | -3.153331 | H | 9.576361  | -4.422179 | -1.489147 |
| N | -10.751413 | 0.191186  | 0.043458  | H | 8.179643  | -3.385315 | -1.699522 |
| F | -10.726903 | -1.588349 | 1.726375  | H | 17.383119 | -3.772002 | -1.205017 |
| F | -9.766075  | -2.018054 | -0.327142 | H | 7.862691  | -4.873222 | 0.295105  |
| C | -11.452167 | 2.368426  | -0.158381 | H | 7.989259  | -3.185493 | 0.842721  |
| C | -14.625211 | 1.710156  | -1.980686 | H | 9.383588  | -4.270779 | 0.998752  |
| C | -15.148038 | 1.682782  | 0.381373  | H | 6.967495  | -2.006787 | -1.047465 |
| C | -9.643725  | 0.998020  | 0.169628  |   |           |           |           |

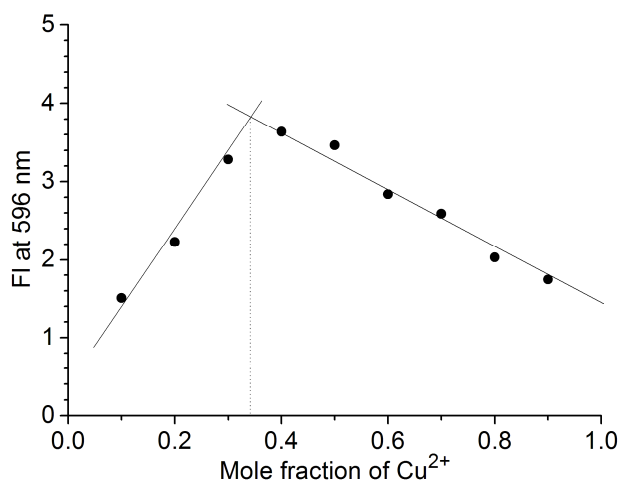

**Fig. S18** Job's plot of **1** with Cu<sup>2+</sup> obtained by fluorescence measurements ( $\lambda_{\text{ex}} = 510 \text{ nm}$ ). The total concentration of **1** and Cu<sup>2+</sup> is 5  $\mu\text{M}$ .

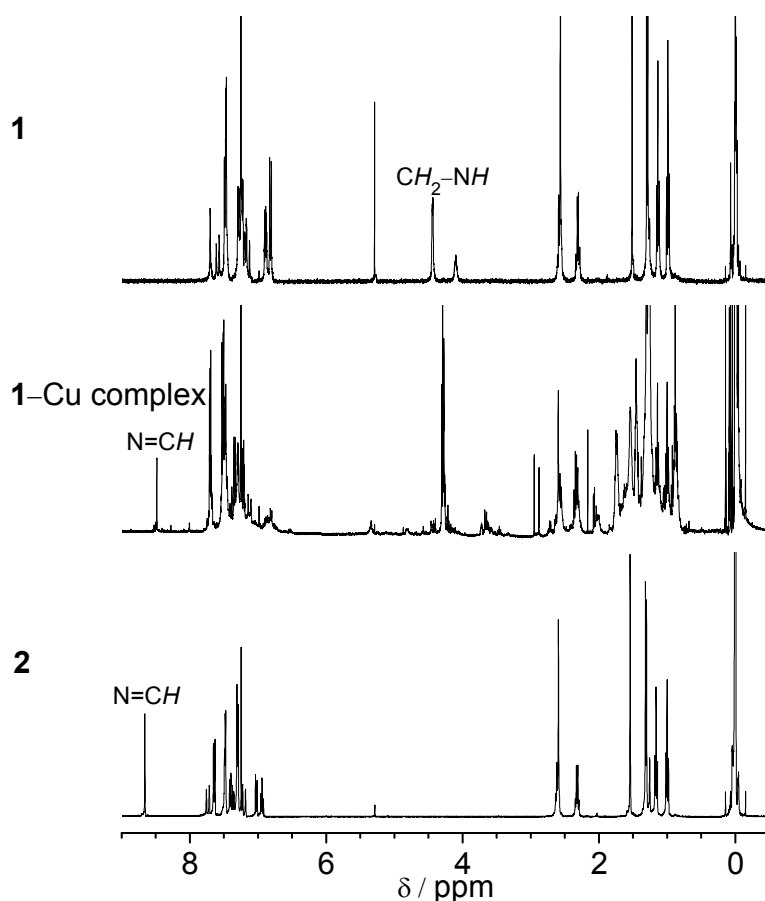

**Fig. S19**  $^1\text{H}$  NMR spectra of **1**, **1**-Cu complex, and **2** measured in  $\text{CDCl}_3$  (400 MHz). The **1**-Cu complex sample was obtained by the following simple procedure: the buffered MeCN/water solution containing **1** was treated with  $\text{Cu}^{2+}$ . The solution was extracted with  $\text{CH}_2\text{Cl}_2$ , washed with water, and concentrated by evaporation.

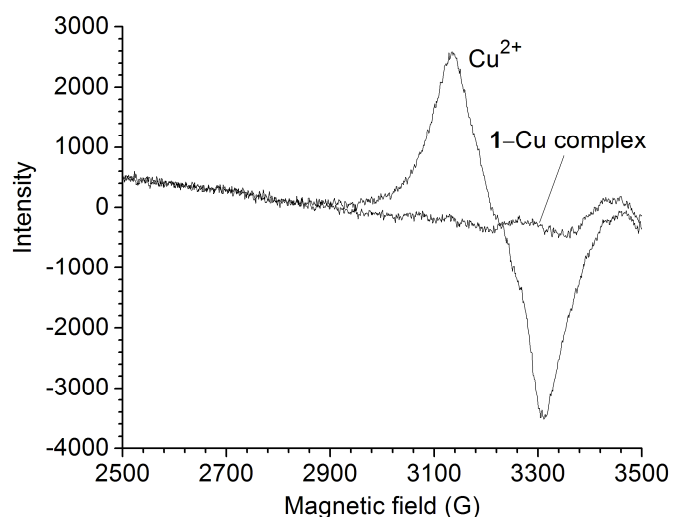

**Fig. S20** ESR spectra of  $\text{Cu}(\text{ClO}_4)_2$  (2 mM) and **1**-Cu complex (ca. 2 mM) in MeCN measured at 25 °C.

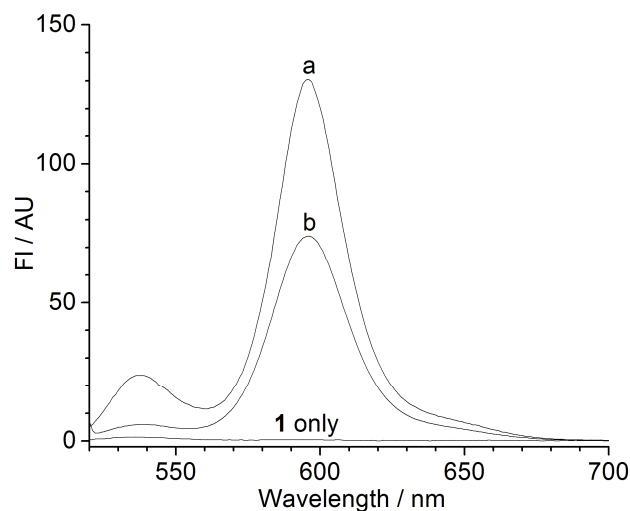

**Fig. S21** Fluorescence spectra ( $\lambda_{\text{ex}} = 510 \text{ nm}$ ) of **1** (5  $\mu\text{M}$ ) measured in a buffered MeCN/water mixture (1/1 v/v; HEPES 100 mM; pH 7.0) with 20 equiv of  $\text{Cu}^{2+}$  under (a) air and (b) argon. The sample (b) was measured by the following simple procedure: argon gas was bubbled through the solution containing **1**, and  $\text{Cu}^{2+}$  was added under argon.

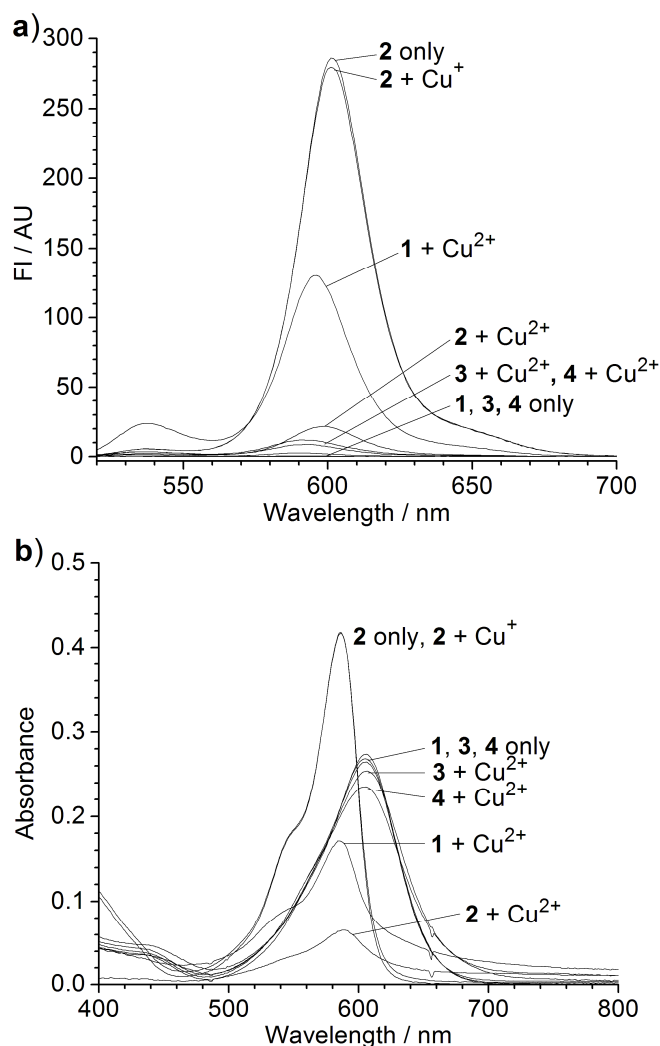

**Fig. S22** (a) Fluorescence ( $\lambda_{\text{ex}} = 510 \text{ nm}$ ) and (b) absorption spectra of **1**, **2**, **3**, and **4** (5  $\mu\text{M}$ ) in a buffered MeCN/water mixture (1/1 v/v; HEPES 100 mM; pH 7.0) measured with and without  $\text{Cu}^{2+}$  or  $\text{Cu}^{+}$  (20 equiv).

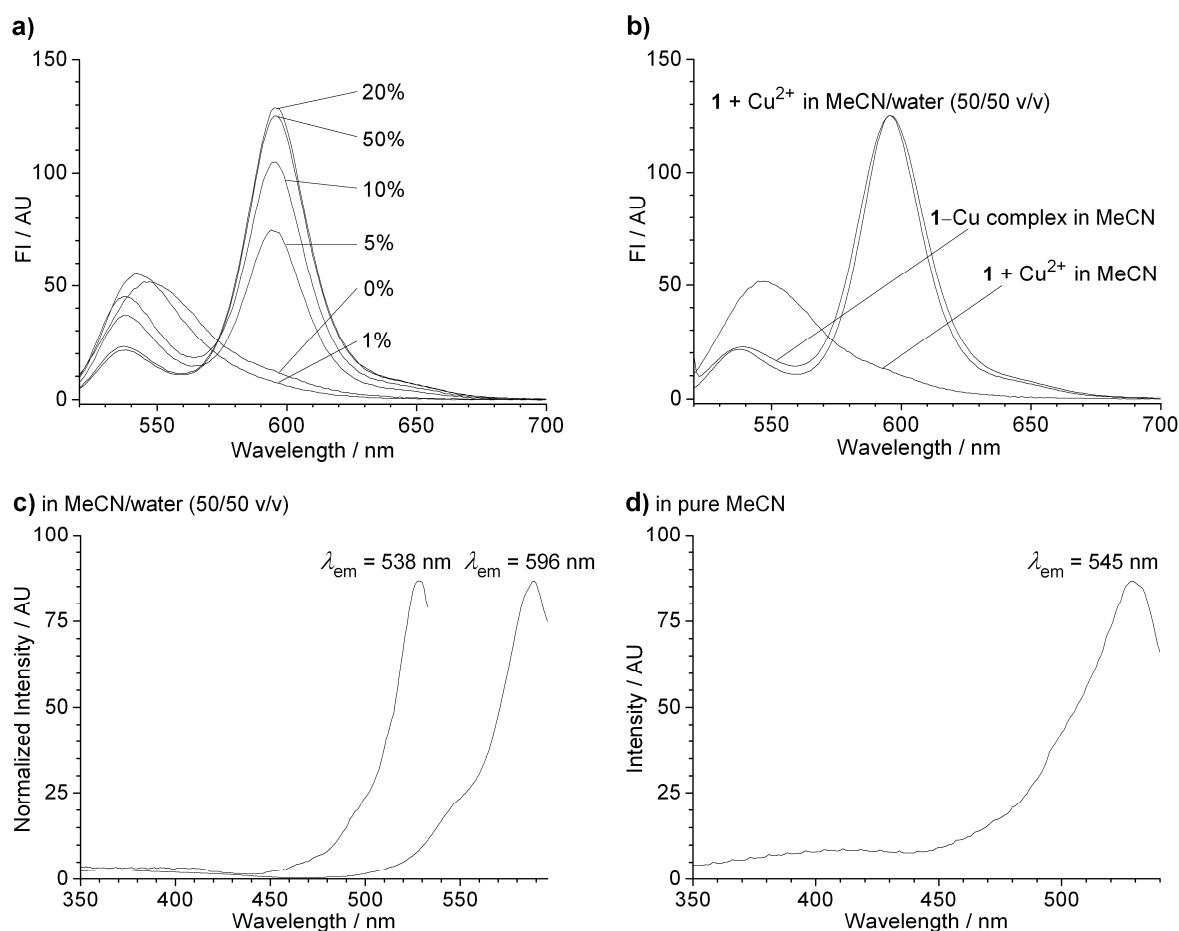

**Fig. S23** (a) Fluorescence spectra ( $\lambda_{\text{ex}} = 510$  nm) of **1** (5  $\mu$ M) +  $\text{Cu}^{2+}$  (20 equiv) in MeCN solution with different amount of water (0–50%, pH 7). (b) Fluorescence spectrum ( $\lambda_{\text{ex}} = 510$  nm) of the isolated **1**-Cu complex when dissolved in MeCN, where the spectra for **1** +  $\text{Cu}^{2+}$  in pure MeCN and in a MeCN/water mixture (50/50 v/v; pH 7.0) are also shown for comparison. (c) Excitation spectra for **1** +  $\text{Cu}^{2+}$  monitored at 538 and 596 nm in a MeCN/water mixture (50/50 v/v). (d) Excitation spectrum for **1** +  $\text{Cu}^{2+}$  monitored at 545 nm in pure MeCN.

#### NOTE for the emission bands:

Two emission bands (538 and 596 nm) in larger water content solution are from **the 1-Cu<sup>+</sup> complex**. In contrast, the single emission band in pure MeCN (545 nm) is probably from **the intermediate**, which has a coordinated structure between **1** and  $\text{Cu}^{2+}$ .

As shown in (a), **1** +  $\text{Cu}^{2+}$  in a MeCN/water mixture ( $\lambda_{\text{ex}} = 510$  nm) shows two emission bands at 538 and 596 nm. As shown in (c), the excitation spectra for these emissions show the bands at 528 and 589 nm, respectively, which correspond to the bands observed in the absorption spectra for **1** +  $\text{Cu}^{2+}$  (Fig. 4). These two emissions are therefore formed by simultaneous excitation ( $\lambda_{\text{ex}} = 510$  nm) of two excitation bands; in other words, both emissions originate from the identical **1-Cu<sup>+</sup> complex**. In addition, as shown in Fig. 3, the titration of **1** with  $\text{Cu}^{2+}$  leads to a simultaneous increase in both emission bands, where the intensity ratio of these bands is almost constant. This also suggests that two emission bands originate from the identical **1-Cu<sup>+</sup> complex**. The MeCN/water mixture of **1** treated with  $\text{Cu}^{2+}$

was extracted with  $\text{CH}_2\text{Cl}_2$ , washed with water, and concentrated by evaporation. It must be noted that, as shown in (b), the fluorescence spectrum of the obtained **1**– $\text{Cu}^+$  complex, when measured in pure MeCN, is close to that observed in a MeCN/water mixture.

In contrast, as shown in (a), **1** +  $\text{Cu}^{2+}$  in pure MeCN shows a 545 nm emission, while the 596 nm emission does not appear. As shown in (d), the excitation spectrum for this emission shows a band at ca. 530 nm. The 545 nm emission is different from the emission for the isolated **1**– $\text{Cu}^+$  complex in pure MeCN (538 nm). This clearly indicates that the 545 nm emission observed in pure MeCN originates from different species. The absence of main 596 nm emission indicates that the single 545 nm emission probably originates from the intermediate, which has a coordinated structure between **1** and  $\text{Cu}^{2+}$  (Scheme 2, center). The absence of water probably suppresses the subsequent dehydrogenation of imine moiety and, hence, shows the single emission band from the coordinated intermediate.
